# Supplementary material
Source: publisher figshare collection journal article supplement (https://acs.figshare.com/ndownloader/files/22728905)
Supplement: Supplementary file 1 [file 22728905]

## Supporting Information

### Conducting Polymer-Reduced Graphene Oxide Sponge Electrode for Electrochemical Detection Based on DNA Hybridization

Kader Dağcı Kırarşan<sup>a\*</sup> and Ezgi Topçu<sup>a</sup>

<sup>a</sup>Department of Chemistry, Faculty of Science, Atatürk University, Erzurum, 25240, TURKEY  
[kdagci@atauni.edu.tr](mailto:kdagci@atauni.edu.tr)

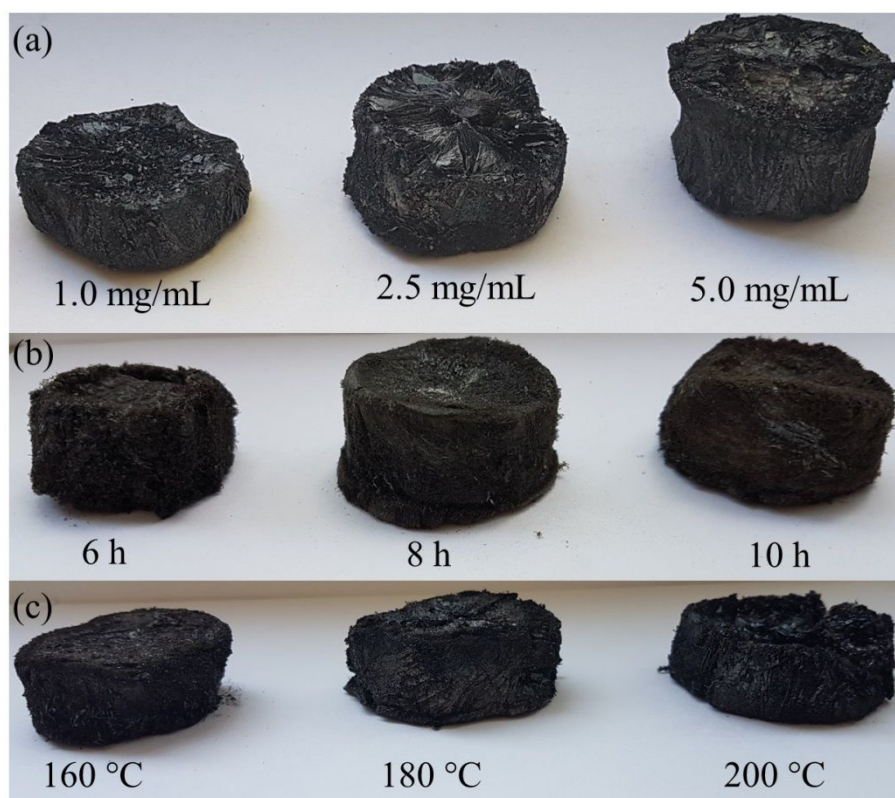

**Figure S1.** Digital camera photographs of PEDOT:PSS/RGO sponge materials obtained at (a) GO concentration of 1.0, 2.5, 5.0 mg/mL, (b) hydrothermal treatment time of 6, 8, 10 h, (c) hydrothermal temperature of 160, 180, 200°C.

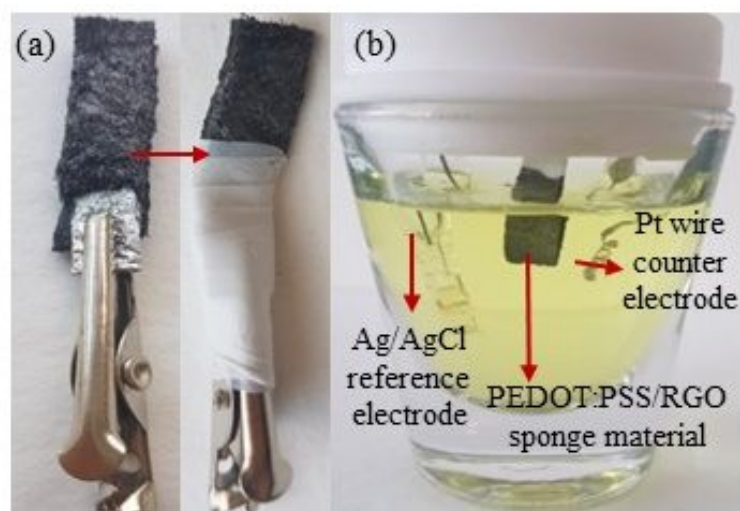

**Figure S2.** Digital camera photographs of (a) sponge material prepared as a working electrode, (b) the electrochemical cell.

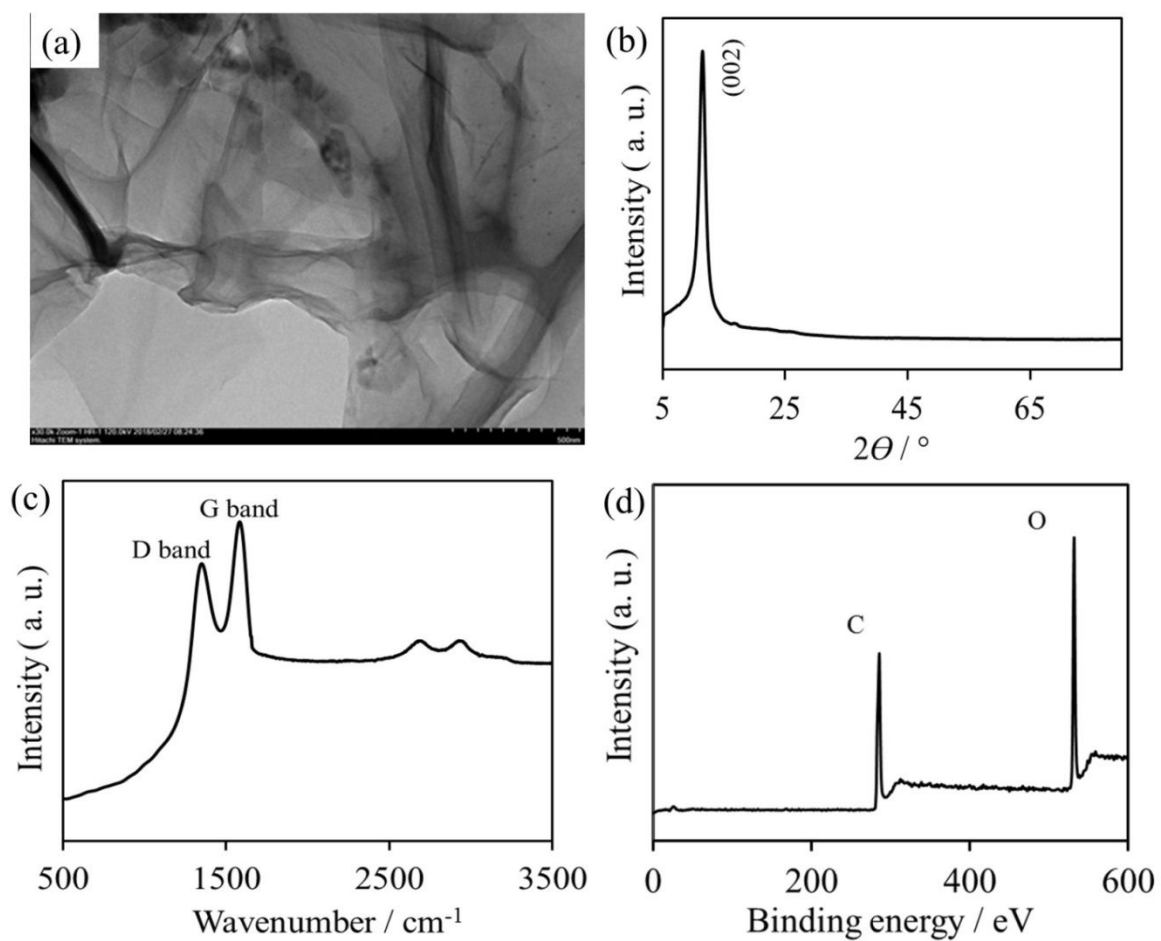

**Figure S3.** (a) TEM image of GO dispersion. (b) XRD, (c) Raman and (d) XPS spectrum of GO.

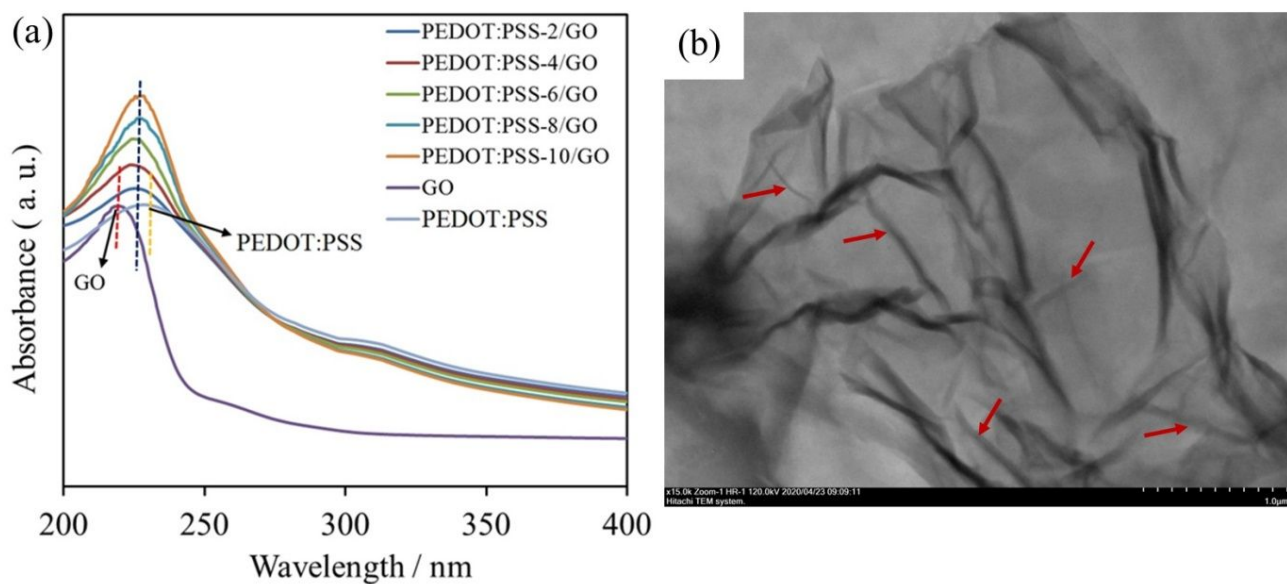

**Figure S4.** (a) UV-vis absorption spectra of GO dispersion, PEDOT:PSS solution and PEDOT:PSS/GO composite structures prepared in different compositions. (b) TEM image of PEDOT:PSS-8/GO composite dispersion.

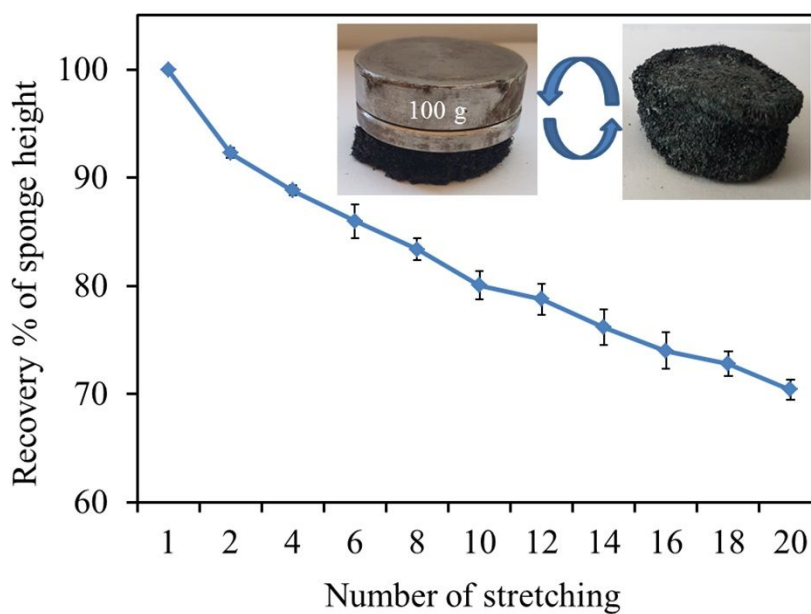

**Figure S5.** The % change in height of PEDOT:PSS-8/RGO depending on the number of stretch cycles. Inset: the digital camera photograph of the experimental cycling process.

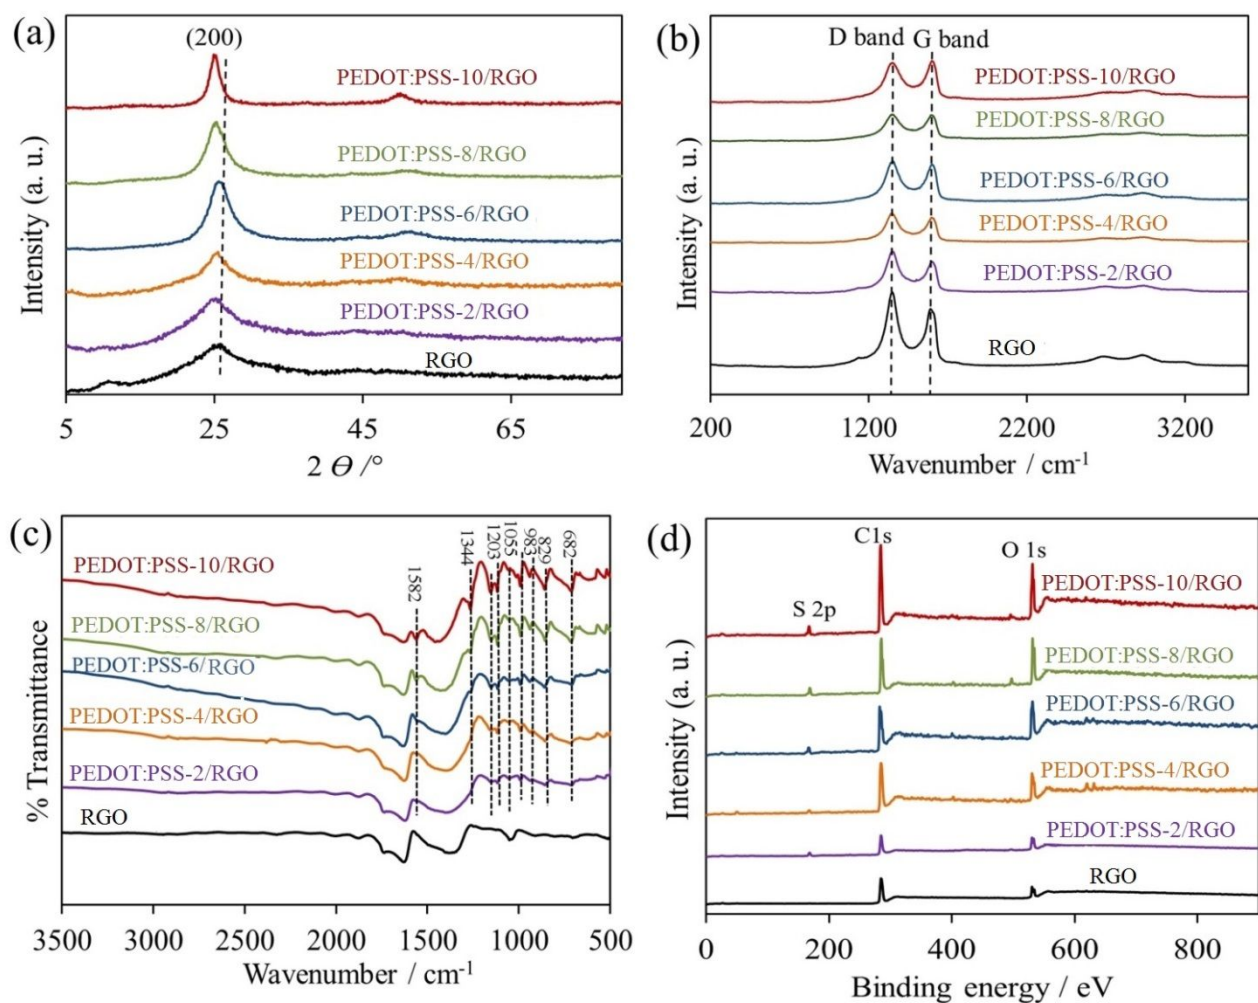

**Figure S6.** (a) XRD patterns, (b) Raman spectra, (c) XPS spectra, and (d) FTIR spectra of RGO sponge and PEDOT:PSS/RGO sponge materials prepared in different compositions.

**Table S1.** Atomic ratio % of elements in sponge materials.

| Sponge materials | % Atomic weight |      |      |
|------------------|-----------------|------|------|
|                  | C 1s            | O 1s | S 2p |
| RGO              | 83.6            | 16.4 | -    |
| PEDOT:PSS-2/RGO  | 74.5            | 23.7 | 1.8  |
| PEDOT:PSS-4/RGO  | 74.1            | 23.6 | 3.2  |
| PEDOT:PSS-6/RGO  | 70.1            | 24.6 | 5.3  |
| PEDOT:PSS-8/RGO  | 67.4            | 26.3 | 6.2  |
| PEDOT:PSS-10/RGO | 59.2            | 30.7 | 10.1 |



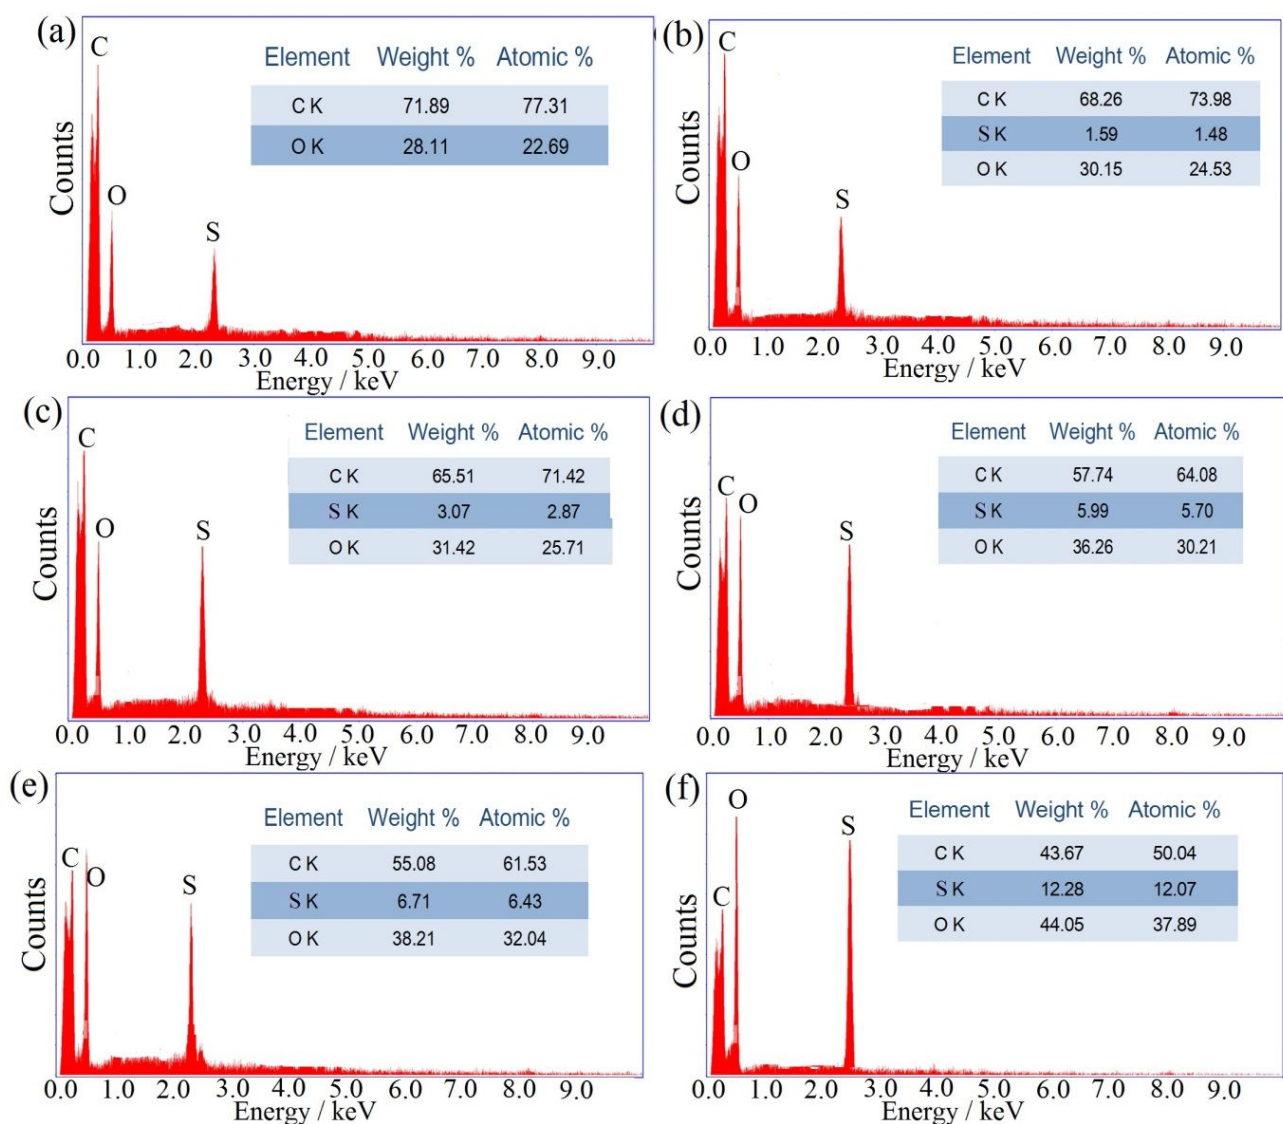

**Figure S7.** EDX of (a) RGO, (b) PEDOT:PSS-2/RGO, (c) PEDOT:PSS-4/RGO, (d) PEDOT:PSS-6/RGO, (e) PEDOT:PSS-8/RGO, and (f) PEDOT:PSS-10/RGO sponge materials.

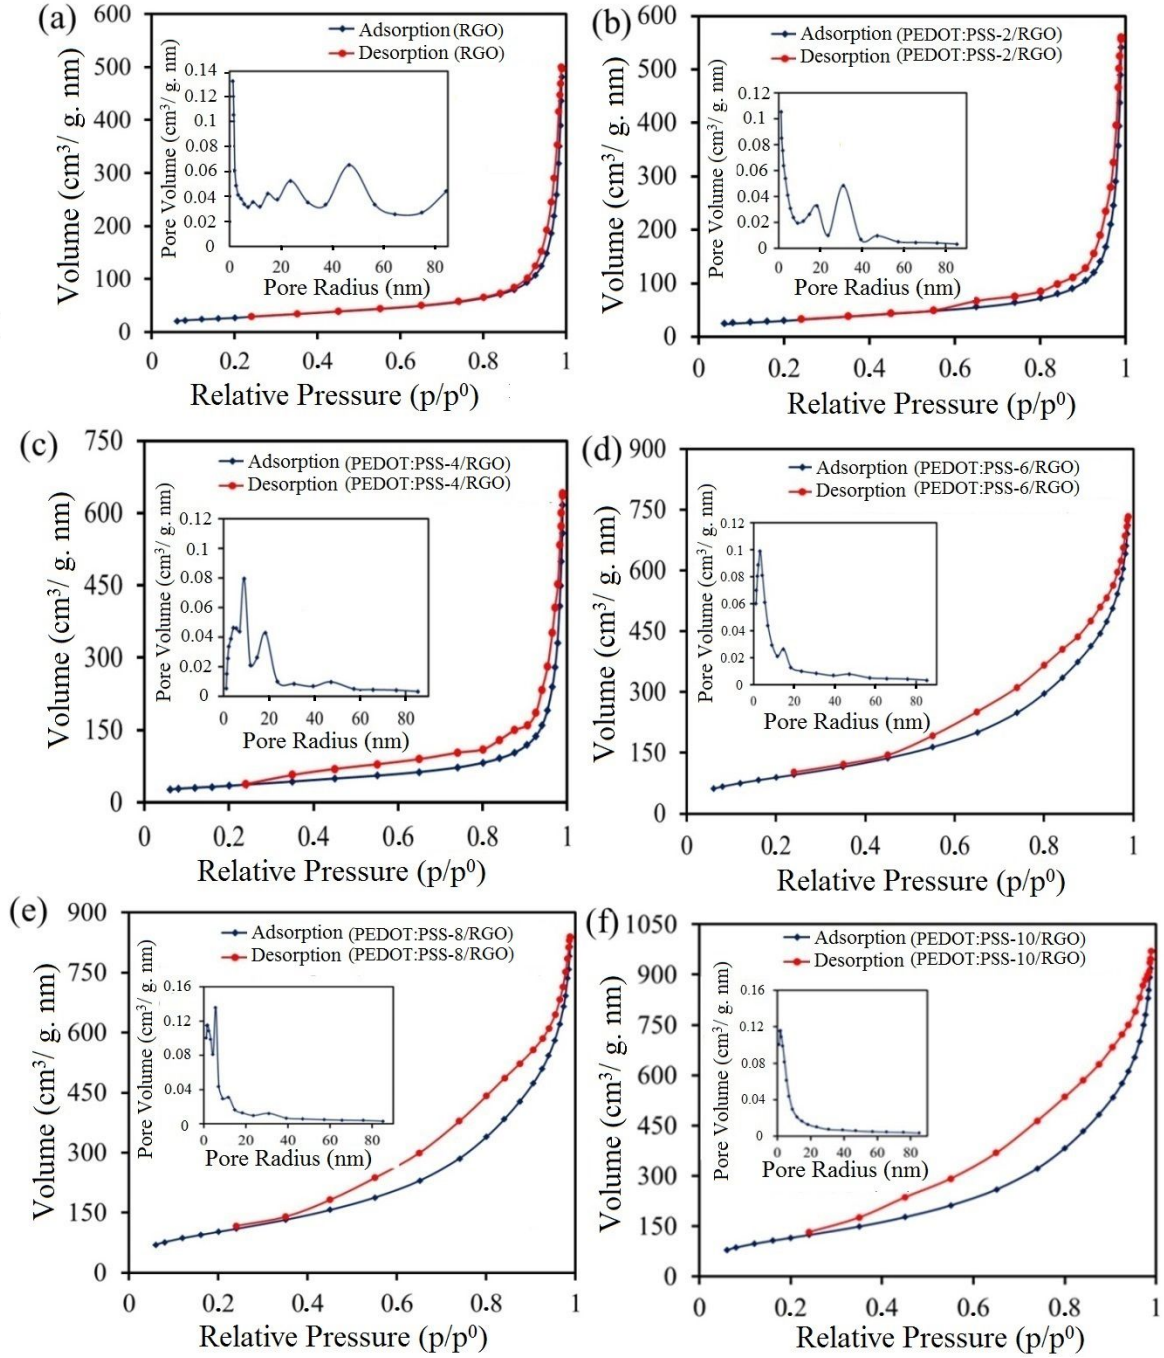

**Figure S8.**  $N_2$  adsorption-desorption isotherms of RGO sponge and PEDOT:PSS/RGO composite sponge materials prepared in different compositions. Inset: BJH pore size distributions of RGO sponge and PEDOT:PSS/RGO composite sponge materials prepared in different compositions.

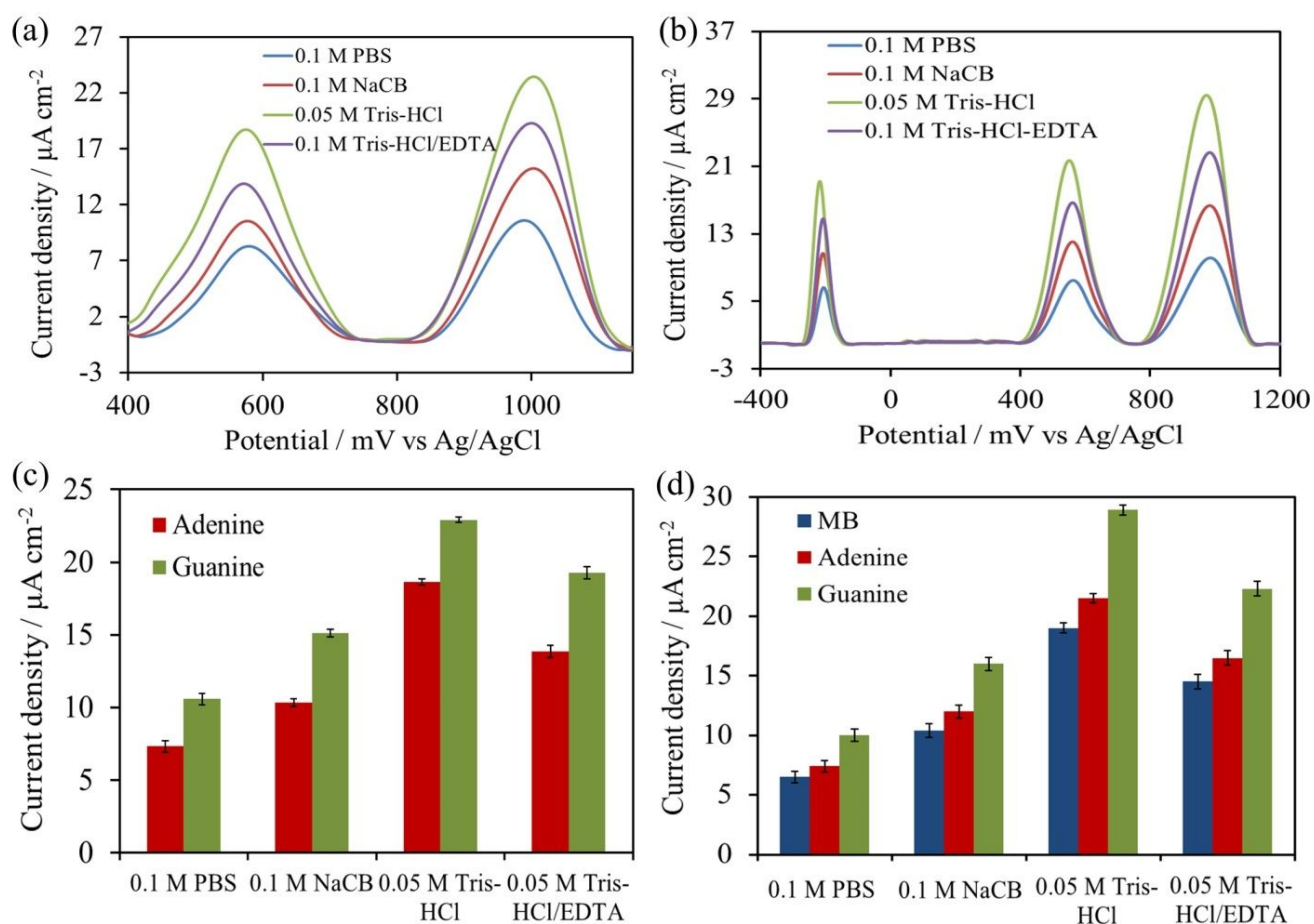

**Figure S9.** DPV curves of PEDOT:PSS-8/RGO composite sponge immersing in different buffer solutions containing (a) 100  $\mu\text{g mL}^{-1}$  ssDNA and (b) 80  $\mu\text{g mL}^{-1}$  MB-ssDNA for 30 min. Current density values in the different buffer solutions for the immobilization of (c) ssDNA and (d) MB-ssDNA probes.

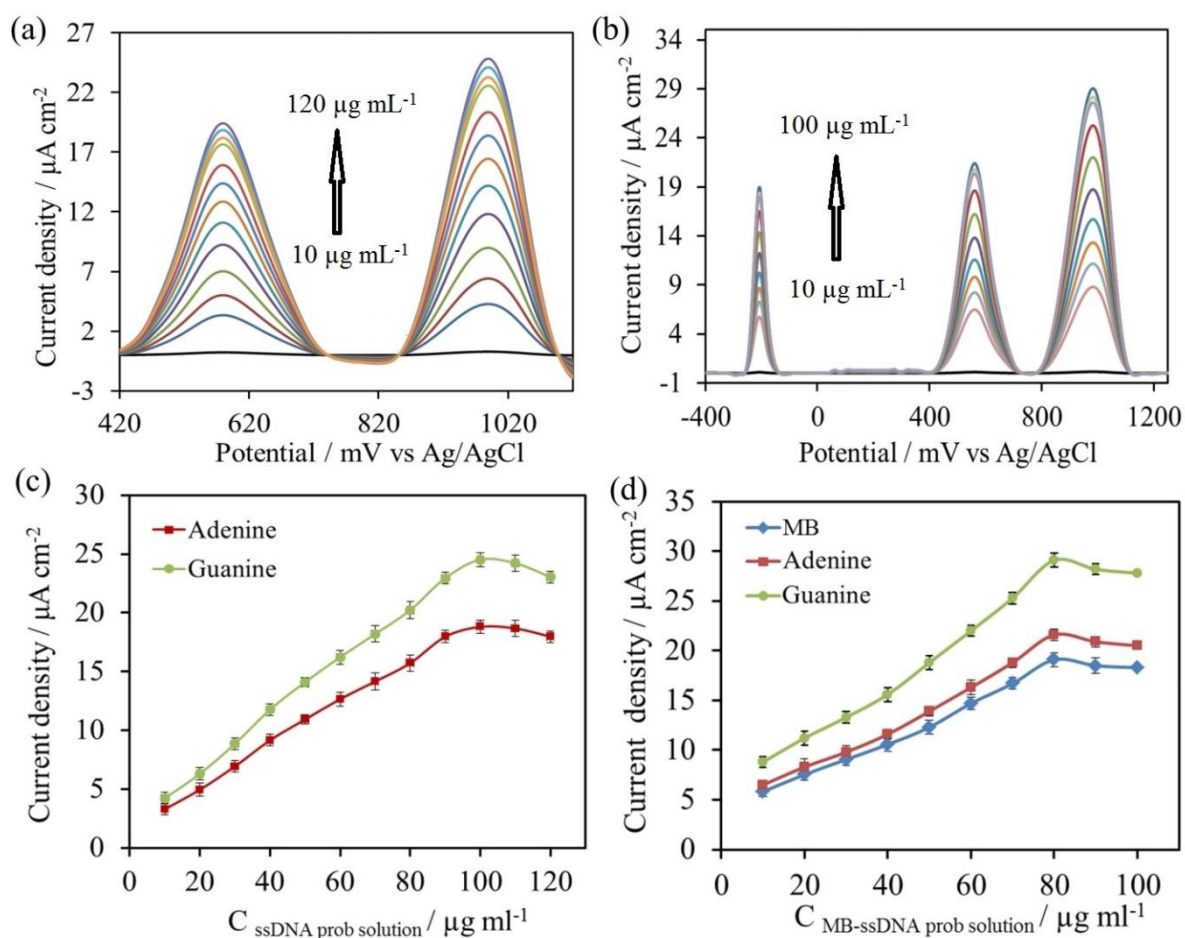

**Figure S10.** DPV curves of PEDOT:PSS-8/RGO composite sponge immersing in 0.05 M Tris-HCl solutions containing different concentrations of (a) ssDNA and (b) MB-ssDNA probes for 30 min. Current density values at different probe concentrations for immobilization of (c) ssDNA and (d) MB-ssDNA probes.



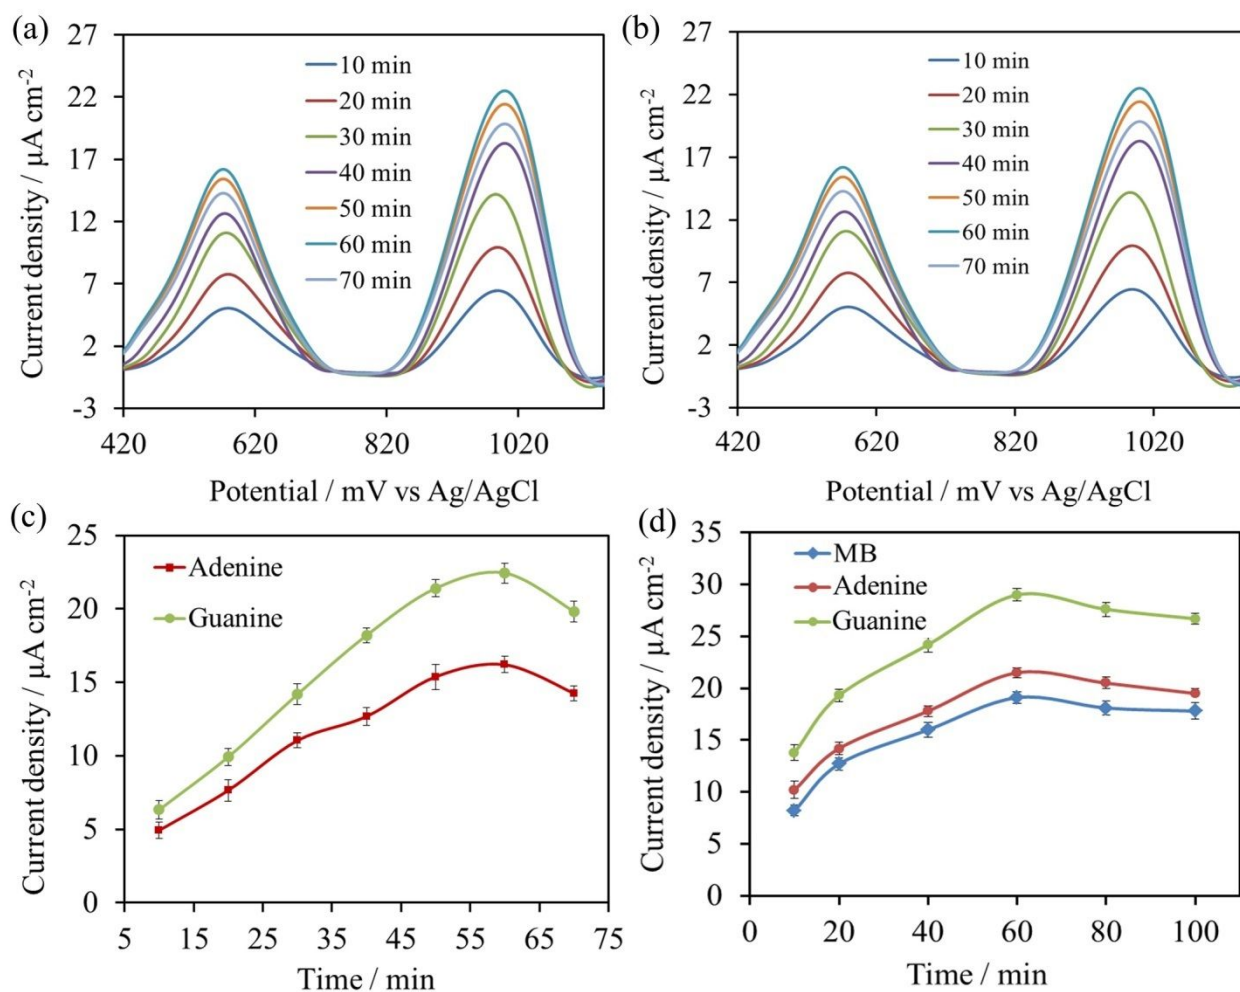

**Figure S11.** DPV curves of PEDOT:PSS-8/RGO composite sponge immersing in 0.05 M Tris-HCl solution containing (a) 100  $\mu\text{g mL}^{-1}$  ssDNA and (b) 60  $\mu\text{g mL}^{-1}$  MB-ssDNA probes for different immobilization times. Current density values for different immobilization times of ssDNA (c) and MB-ssDNA (d) probes.

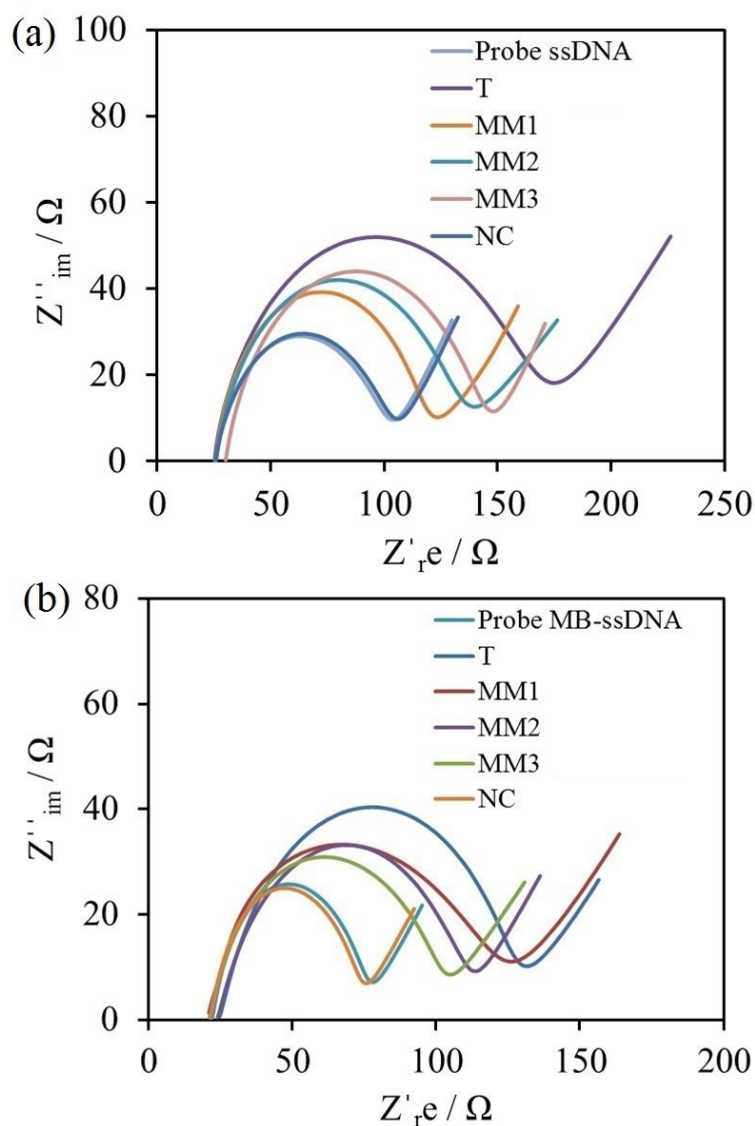

**Figure S12.** Nyquist plots of sponge samples in 0.05 M Tris-HCl buffer solution, probe immobilized (a) ssDNA-PEDOT:PSS-8/RGO and (b) MB-ssDNA-PEDOT:PSS-8/RGO after hybridization with the target sequence, one-base mismatched, two-base mismatched, three-base mismatched, four-base mismatched and non-complementary sequences.

**Table S2.**  $R_p$  and  $R_u$  values of ssDNA and MB-ssDNA calculated from Nyquist curves.

|                       | ssDNA          |                | MB-ssDNA       |                |
|-----------------------|----------------|----------------|----------------|----------------|
|                       | $R_p (\Omega)$ | $R_u (\Omega)$ | $R_p (\Omega)$ | $R_u (\Omega)$ |
| Probe                 | 80             | 25             | 78             | 25             |
| Target                | 160            | 24             | 154            | 24             |
| One-base mismatched   | 100            | 28             | 98             | 28             |
| Two-base mismatched   | 119            | 24             | 117            | 25             |
| Three-base mismatched | 134            | 26             | 128            | 24             |
| Non-complementary     | 83             | 25             | 79             | 24             |

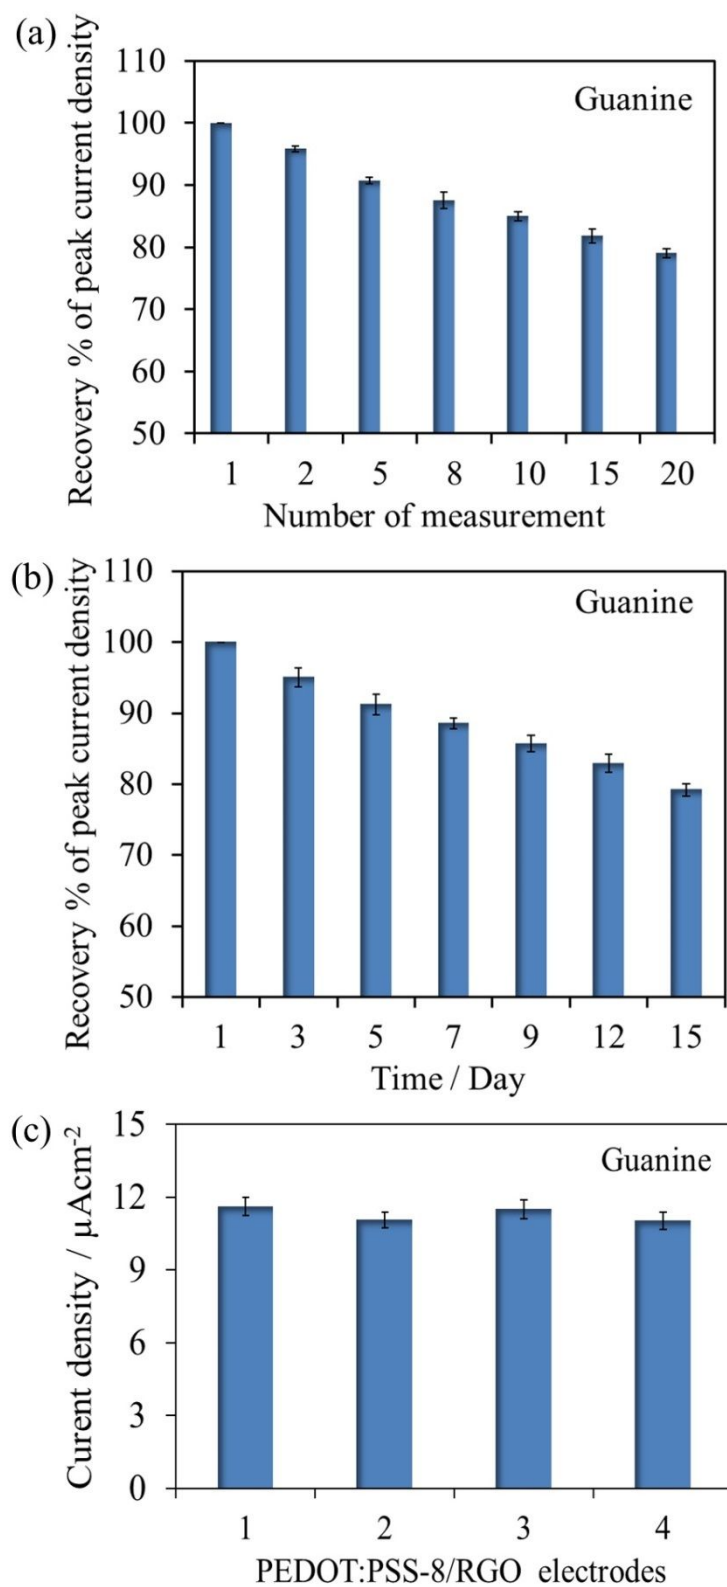

**Figure S13.** (a) Reusability, (b) time stability, and (c) reproducibility of PEDOT:PSS-8/RGO sponge sensor for the electrochemical detection of DNA.

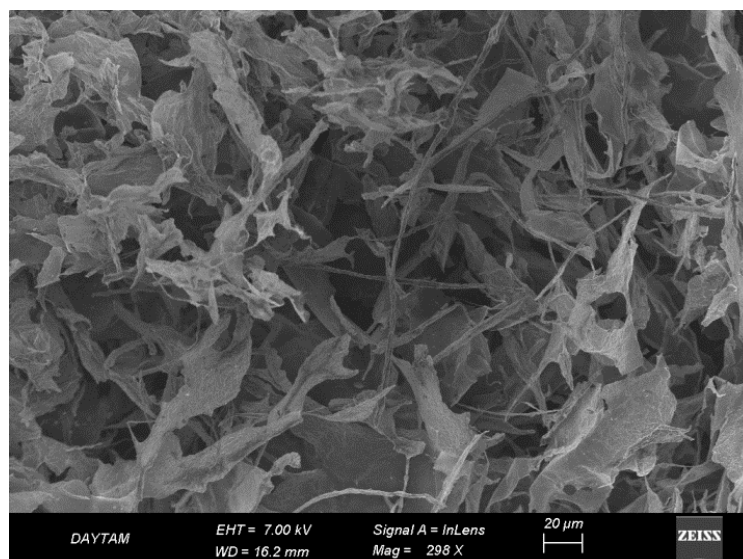

**Figure S14.** FESEM image of PEDOT:PSS-8/RGO composite sponge material after electrochemical DNA detection.
